# Supplementary material for: An epigenetic switch regulates the ontogeny of AXL-positive/EGFR-TKi-resistant cells by modulating miR-335 expression
Source: eLife journal article supplement (doi:10.7554/elife.66109), 2021-07-12
Supplement: supp [file elife-66109-supp-v1.zip]

A

| Cell Line | EGFR activating Mutations | Another mutation/ driver oncogene | Phenotype    |
|-----------|---------------------------|-----------------------------------|--------------|
| H1650     | delE746-A750              |                                   | Epithelial   |
| A549      | WT                        | KRAS G12S                         | Epithelial   |
| PC9       | delE746-A750              |                                   | Intermediate |
| H23       | WT                        |                                   | Mesenchymal  |
| H1650-M3  | delE746-A750              |                                   | Mesenchymal  |
| H1703     | WT                        | PDGFR overexpression              | Mesenchymal  |
| H1975     | L858R/ T790M              |                                   | Mesenchymal  |

B

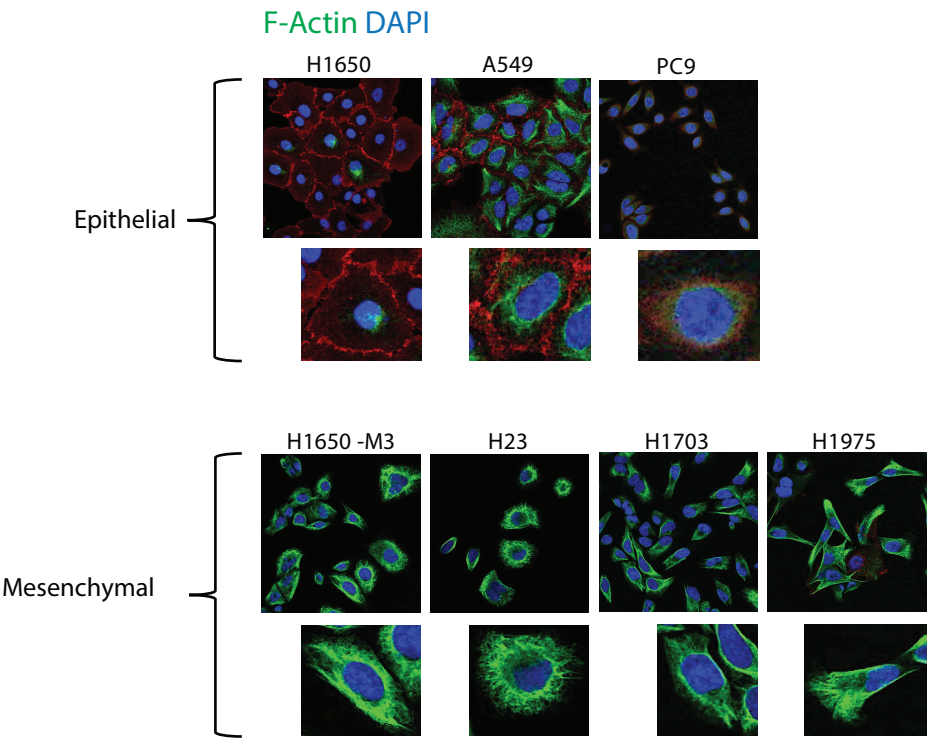

C

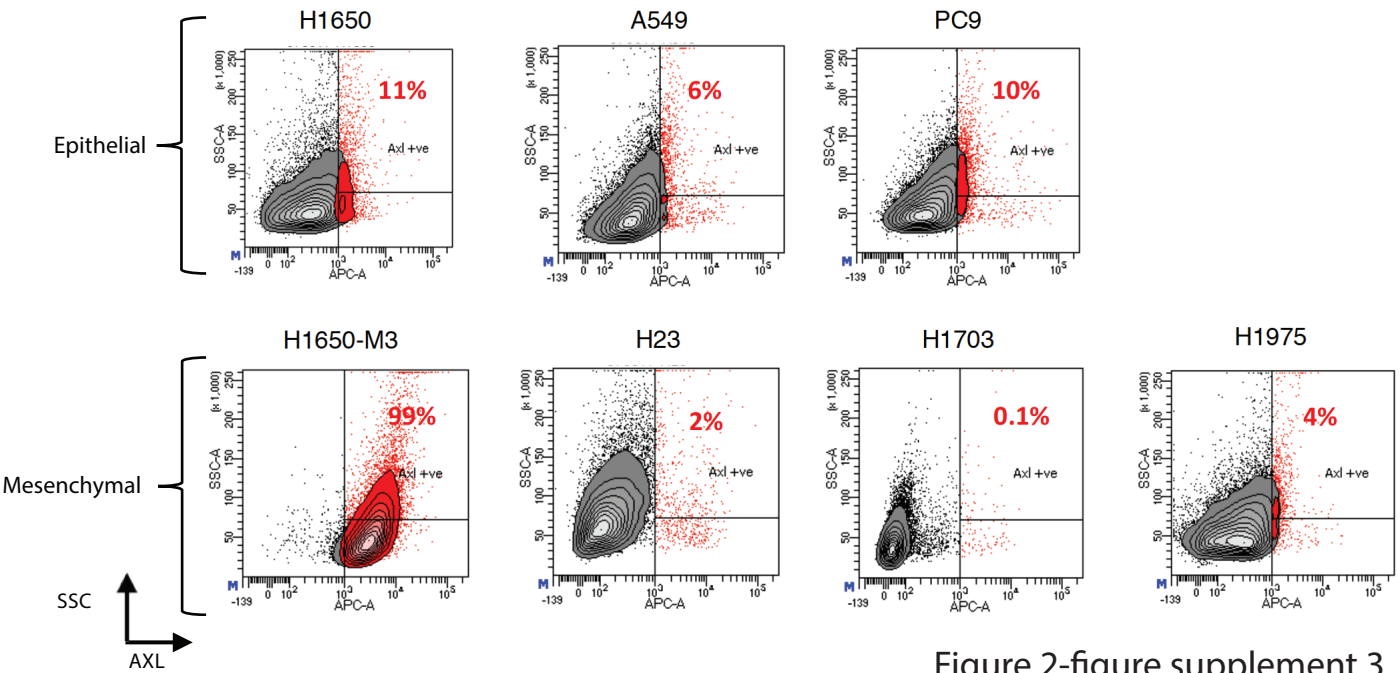

Figure 2-figure supplement 3
