# Supplementary material for: An epigenetic switch regulates the ontogeny of AXL-positive/EGFR-TKi-resistant cells by modulating miR-335 expression
Source: eLife journal article supplement (doi:10.7554/elife.66109), 2021-07-12
Supplement: supp [file elife-66109-supp-v1.zip]

Archive with 12 entries (12 files):
- elife_poa_e66109_Transparent_Reporting_File.docx
- elife_poa_e66109_Figure_2_figure_supplement_1.pdf
- elife_poa_e66109_Figure_2_figure_supplement_2.pdf
- elife_poa_e66109_Figure_2_figure_supplement_3.pdf
- elife_poa_e66109_Figure_3_figure_supplement_1.pdf
- elife_poa_e66109_Figure_4_figure_supplement_1.pdf
- elife_poa_e66109_Figure_5_figure_supplement_1.pdf
- elife_poa_e66109_Figure_5_figure_supplement_2.pdf
- elife_poa_e66109_Figure_5_figure_supplement_3.pdf
- elife_poa_e66109_Figure_6_figure_supplement_1.pdf
- elife_poa_e66109_Supplementary_file_1.docx
- elife_poa_e66109_Figure_4_source_data_1.xlsx
