# Supplementary material for: An epigenetic switch regulates the ontogeny of AXL-positive/EGFR-TKi-resistant cells by modulating miR-335 expression
Source: eLife journal article supplement (doi:10.7554/elife.66109), 2021-07-12
Supplement: supp [file elife-66109-supp-v1.zip › elife_poa_e66109_Figure_4_source_data_1.xlsx]

## Sheet: Sheet1
MiRnas	Axl+ve (# reads)	Axl-ve (#reads)	Fold change Axl+ve/Axl-ve
hsa-miR-205	1033	4	8.23269
hsa-miR-452	5203	21	8.17288
hsa-miR-452*	2134	13	7.57897
hsa-miR-224	2874	20	7.38698
hsa-miR-141	11078	99	7.02612
hsa-miR-200c	1874	19	6.84404
hsa-miR-192	15682	177	6.68928
hsa-miR-194	24744	404	6.15665
hsa-miR-95	1165	29	5.5482
hsa-miR-99a	6500	449	4.07572
hsa-miR-31	125416	13475	3.43843
hsa-miR-34a	14473	1760	3.25978
hsa-let-7c	12847	1683	3.15239
hsa-miR-335	2076	318	2.92677
hsa-miR-183	1771	342	2.59256
hsa-miR-20a	106957	24364	2.35427
hsa-miR-18a	2736	754	2.0795
hsa-miR-29c	8318	1387	2.80434
hsa-miR-17	7713	2371	1.92186
hsa-miR-92a	6076	2151	1.71818
hsa-miR-182	3244	947	1.9964
hsa-miR-374b	1264	460	1.67836
hsa-miR-532-5p	654	4338	-2.5096
hsa-miR-27a*	209	1050	-2.10875
hsa-miR-1275	336	1733	-2.14667
hsa-miR-195	187	2282	-3.38912
hsa-miR-193a-5p	1231	15547	-3.43867
hsa-miR-181a-2*	258	3385	-3.49365
hsa-miR-152	82	1236	-3.69384
hsa-miR-497	143	4215	-4.66138
hsa-miR-153	33	1102	-4.84145
hsa-miR-486-5p	32	1207	-5.01714
hsa-miR-221	3582	17286	-2.0507
hsa-miR-181c	701	4792	-2.55308
hsa-miR-660	538	3810	-2.60405
hsa-miR-130b	1159	8634	-2.67708
hsa-miR-328	239	2039	-2.87271
hsa-miR-218	119	1122	-3.01697
hsa-miR-191	17811	78777	-1.92494
hsa-miR-137	3479	13788	-1.7666
hsa-miR-143	64	2755	-5.20777
hsa-let-7a	113263	86951	0.601468
hsa-miR-551b	120	0	0
hsa-miR-582-3p	159	0	0
hsa-miR-765	0	1	0
hsa-miR-21	1566360	1288421	0.501878
Total	396035	220345
