# Supplementary figures and images for: An epigenetic switch regulates the ontogeny of AXL-positive/EGFR-TKi-resistant cells by modulating miR-335 expression
Source: eLife journal article supplement (doi:10.7554/elife.66109), 2021-07-12

A

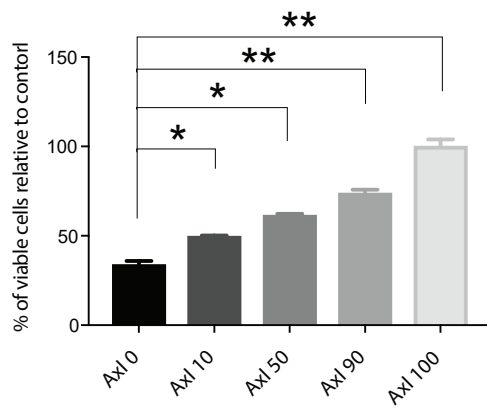

B

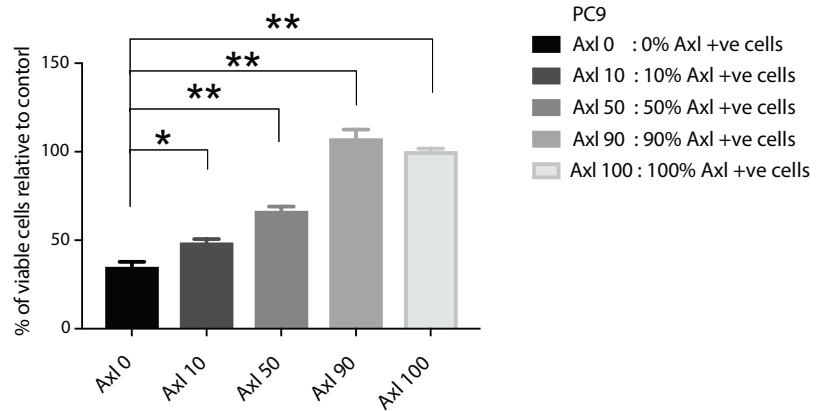

C

F-Actin DAPI

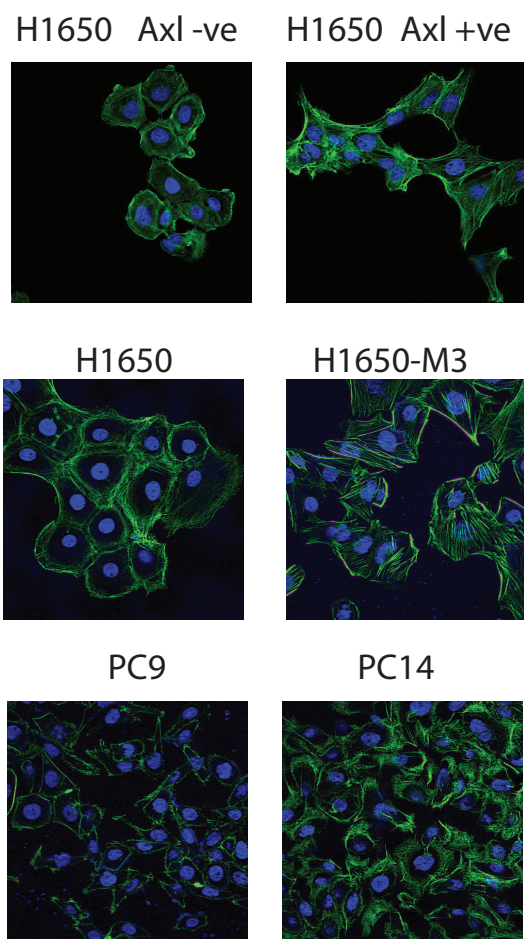

D

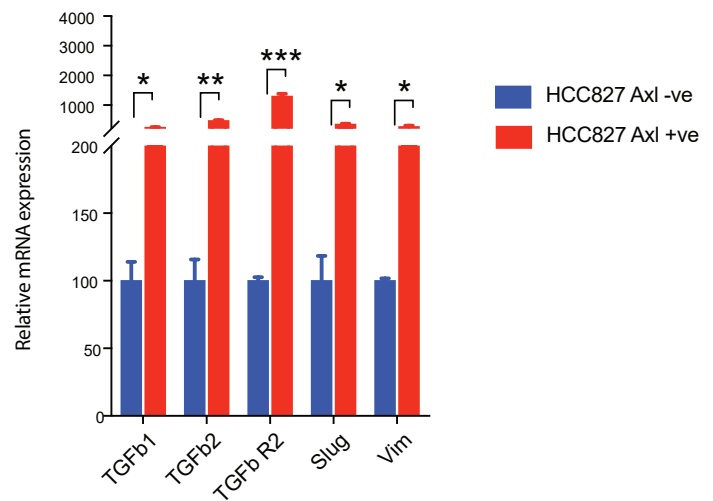

E

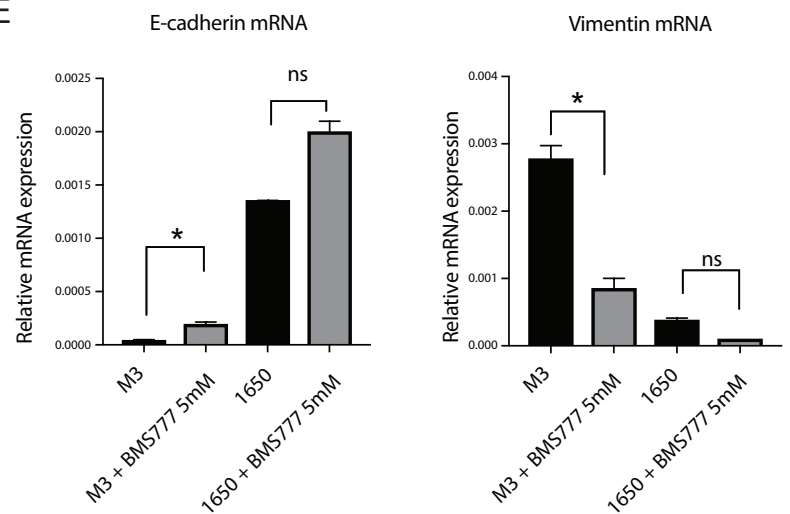

Figure 2-figure supplement 2

Supplement: supp [file elife-66109-supp-v1.zip]

A

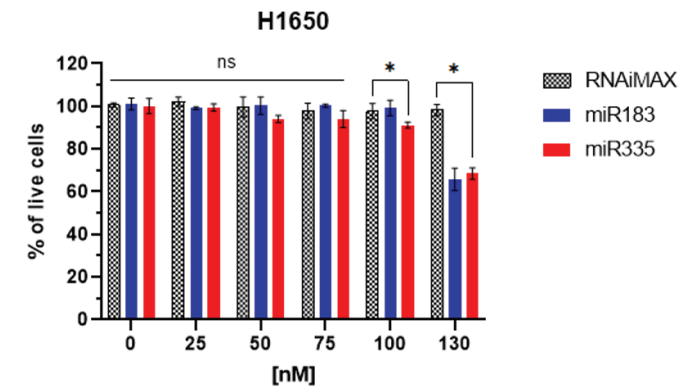

B

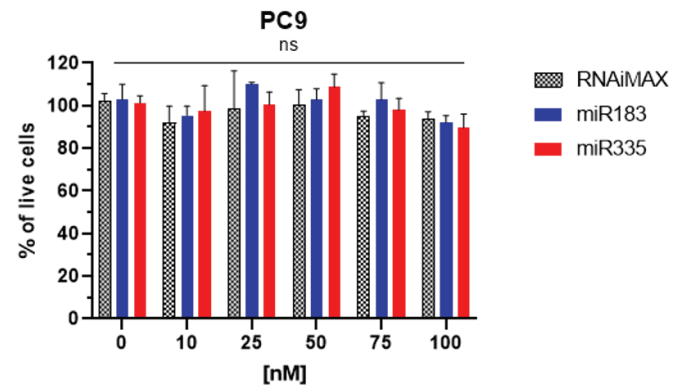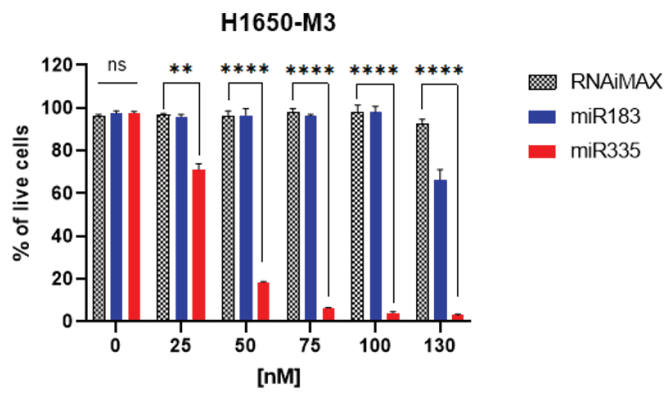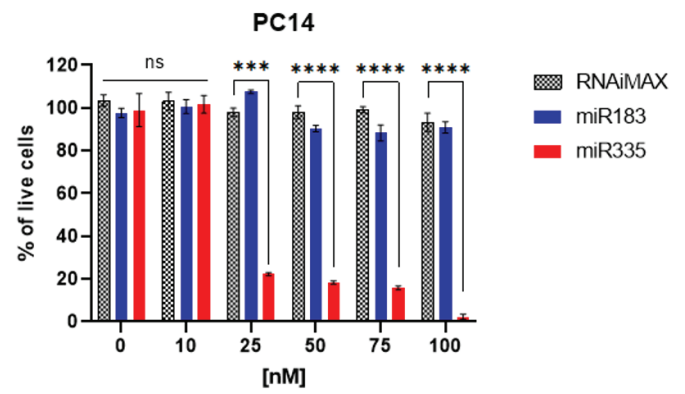

Figure 5-figure supplement 3

Supplement: supp [file elife-66109-supp-v1.zip]

**A**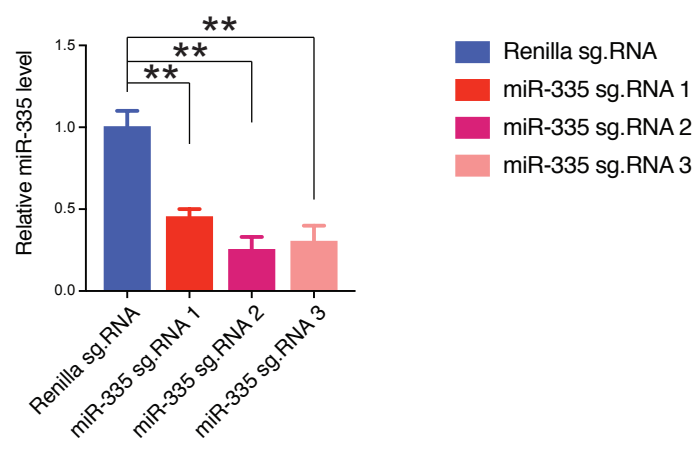**B**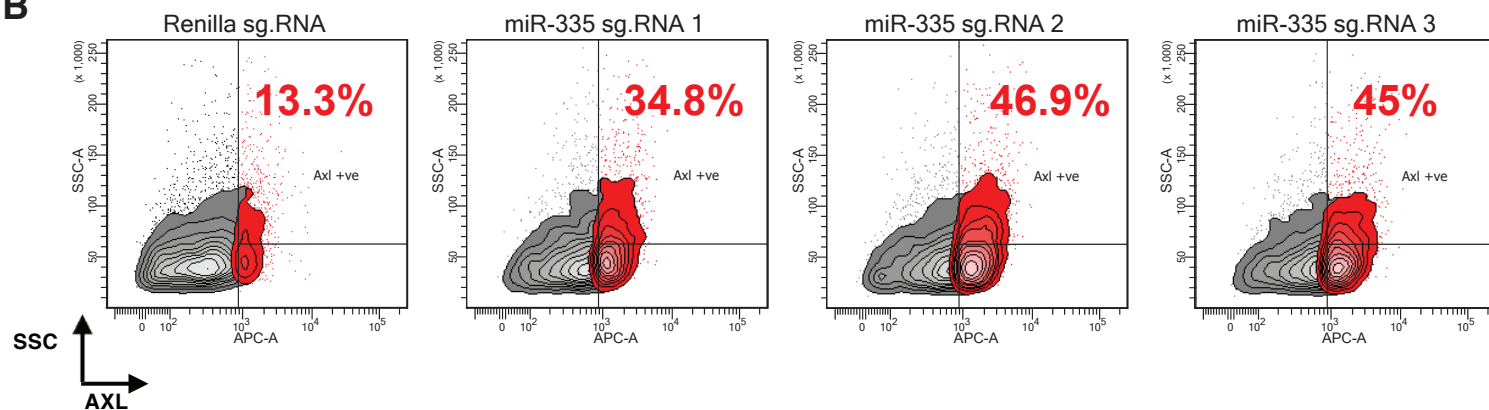**C**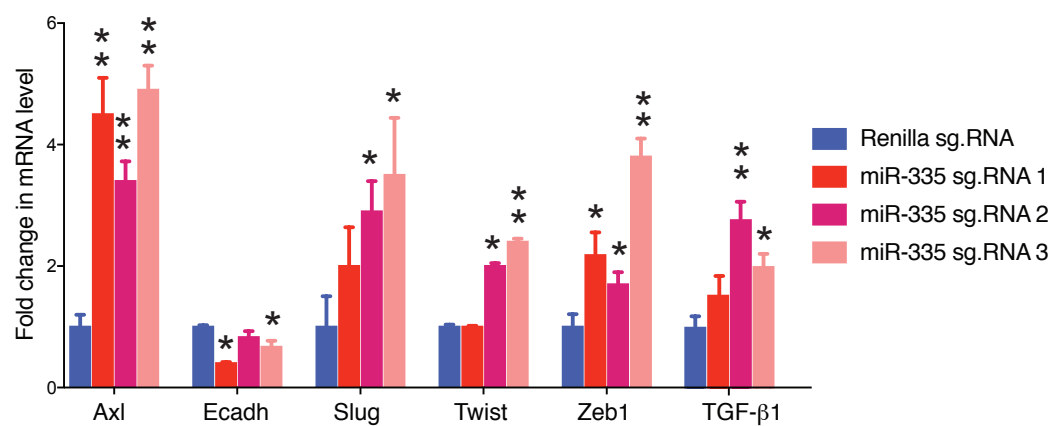**Figure 5-figure supplement 2**

Supplement: supp [file elife-66109-supp-v1.zip]

A

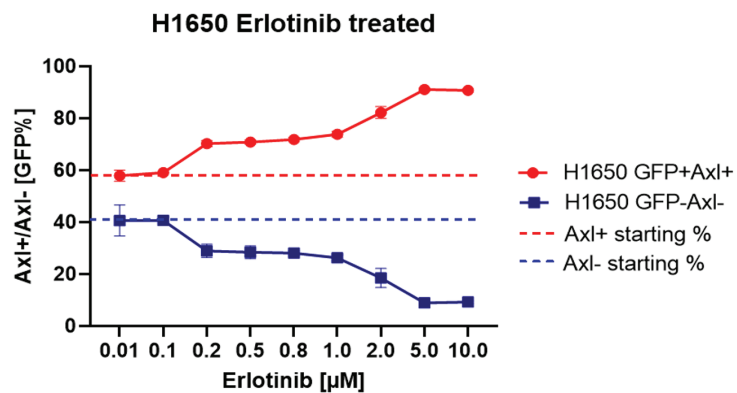

B

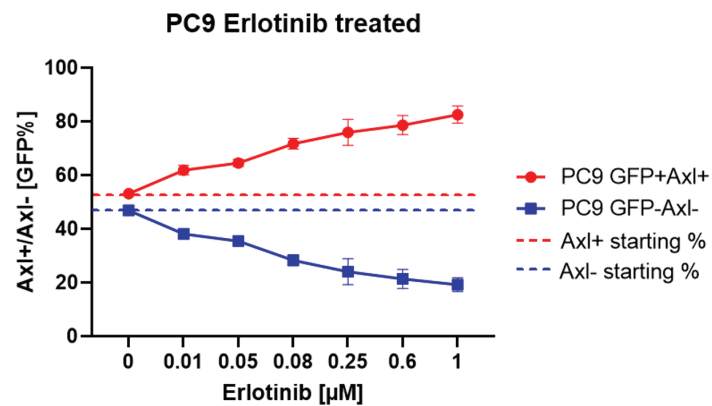

C

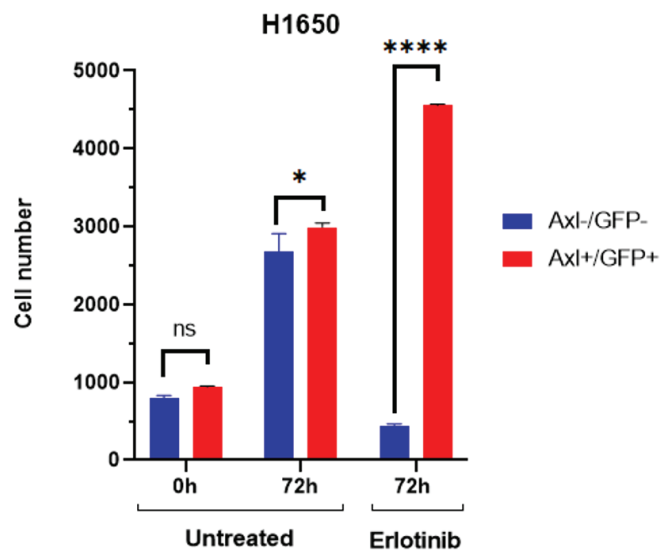

D

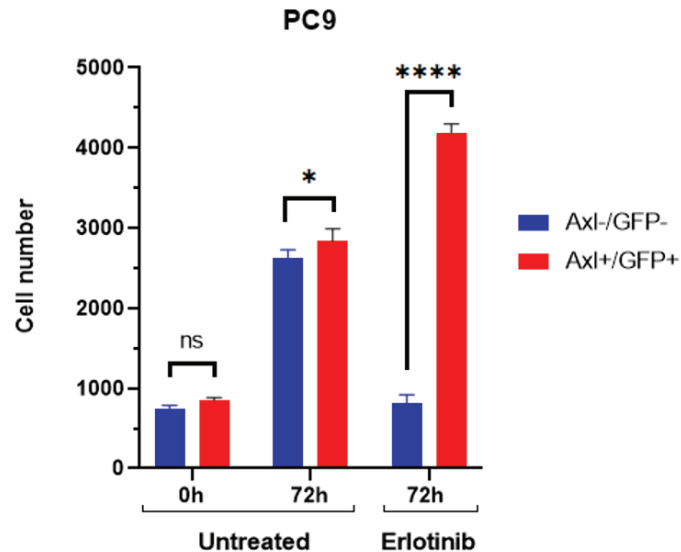

Figure 2-figure supplement 1

Supplement: supp [file elife-66109-supp-v1.zip › elife_poa_e66109_Figure_2_figure_supplement_1.pdf]

A

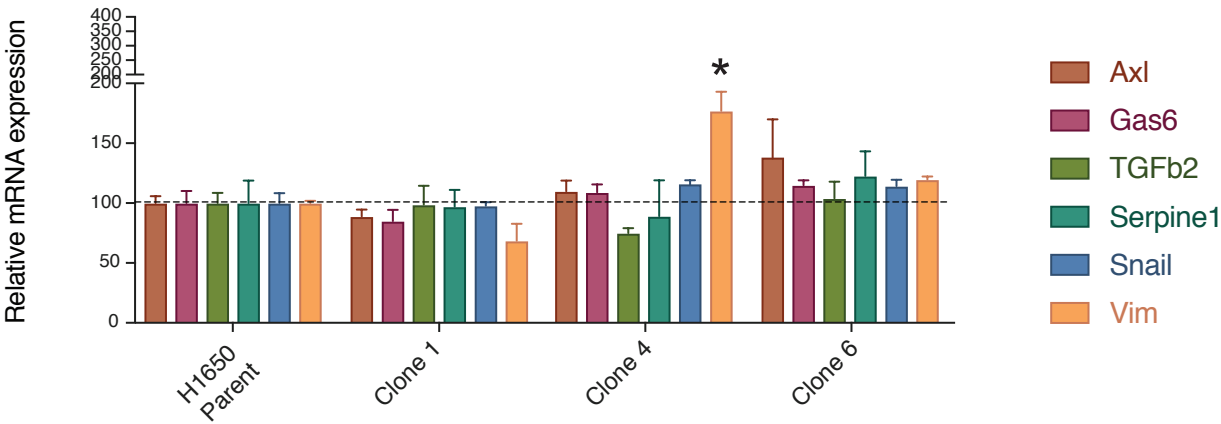

B

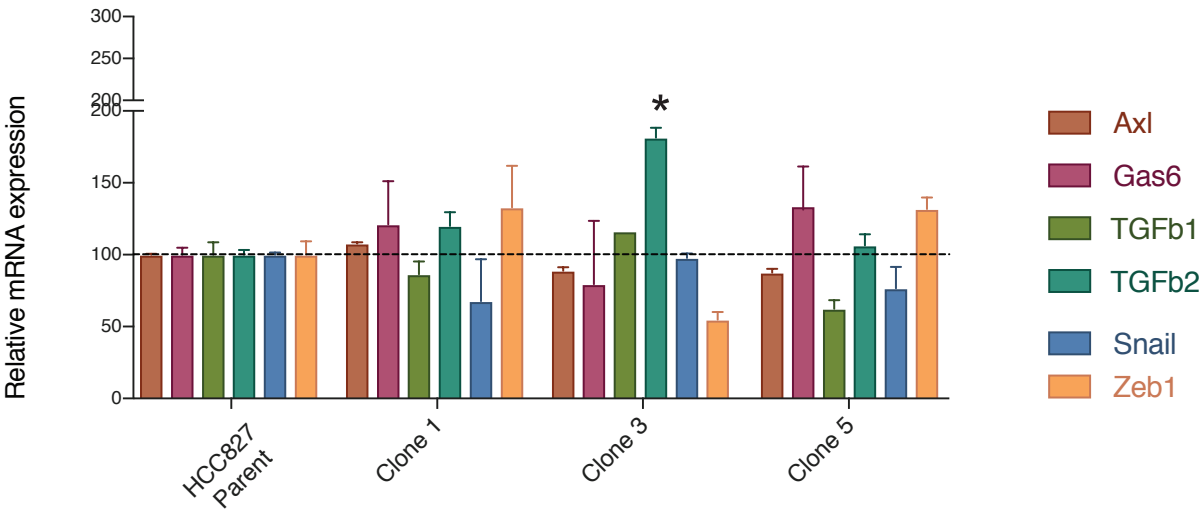

Figure 3-figure supplement 1

Supplement: supp [file elife-66109-supp-v1.zip › elife_poa_e66109_Figure_3_figure_supplement_1.pdf]

**A    FACS profile for 1650 and pc9 + LNA**

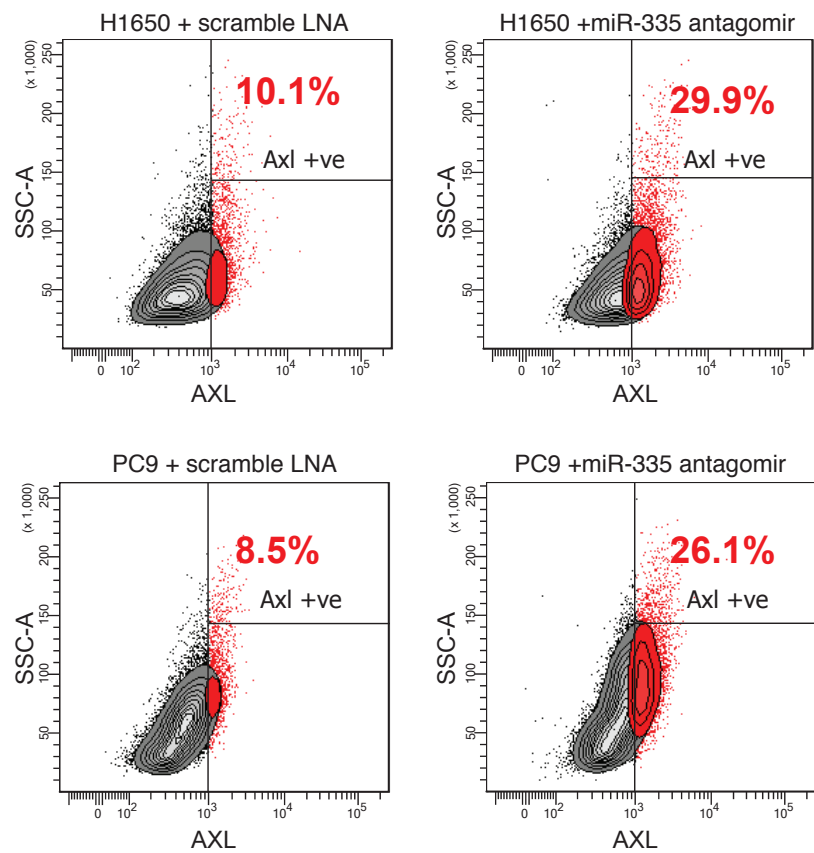

**Figure 5-figure supplement 1**

Supplement: supp [file elife-66109-supp-v1.zip › elife_poa_e66109_Figure_5_figure_supplement_1.pdf]

**A**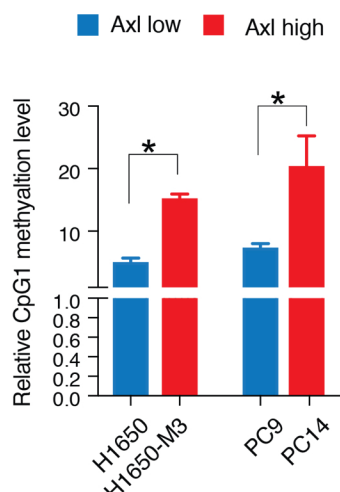**B**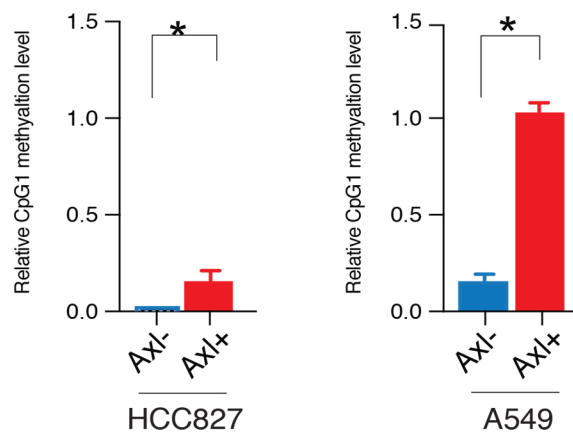**C**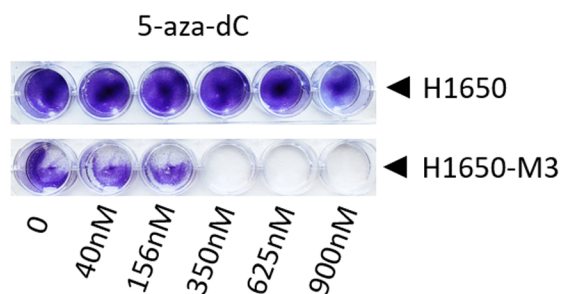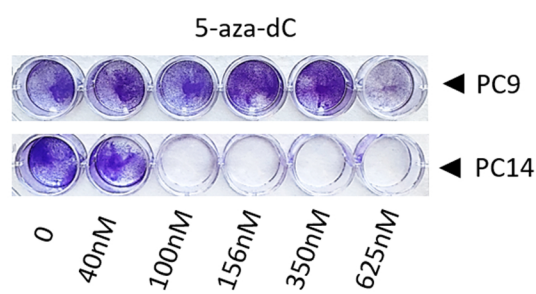**D**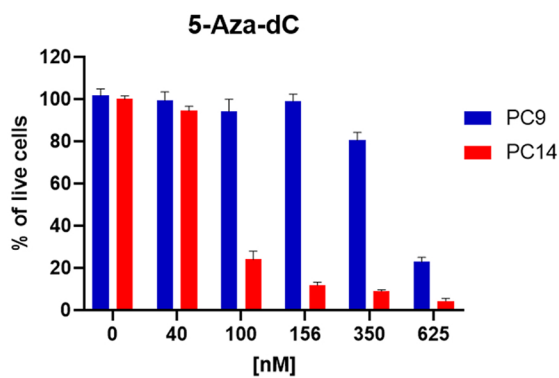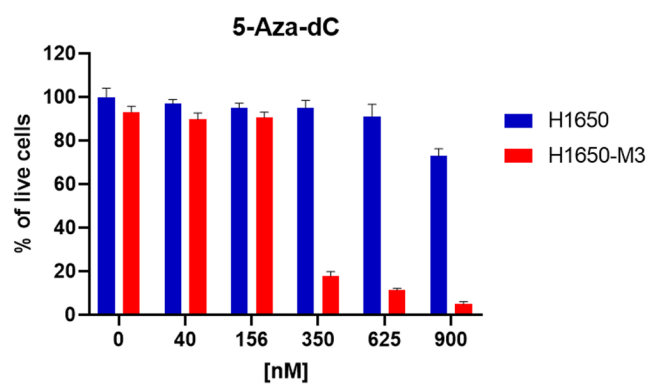**E**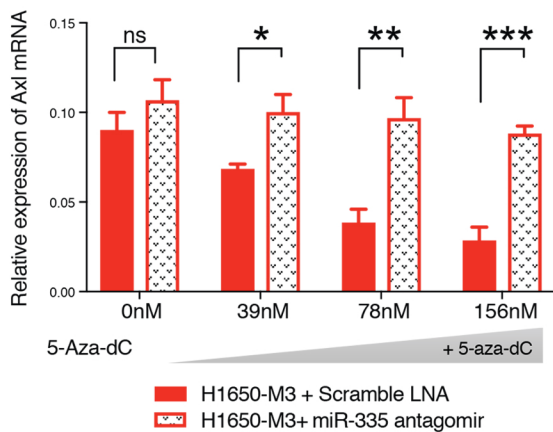**F**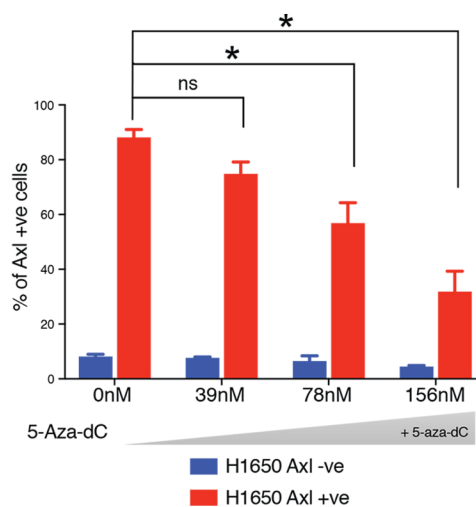**Figure 6-figure supplement 1**

Supplement: supp [file elife-66109-supp-v1.zip › elife_poa_e66109_Figure_6_figure_supplement_1.pdf]
